# Supplementary material for: Nano Pt-decorated transparent solution-processed oxide semiconductor sensor with ppm detection capability
Source: RSC Adv. 2019 Feb 20;9(11):6193–8. doi: 10.1039/c8ra09917k (PMC9062710; doi:10.1039/c8ra09917k)
Supplement: RA-009-C8RA09917K-s001 [file RA-009-C8RA09917K-s001.pdf]

## Supplementary Information

### **Nano Pt-decorated Transparent Solution-processed Oxide Semiconductor Sensor with ppm Detection Capability**

Jingu Kang<sup>a</sup>, Kyung-Tae Kim<sup>a</sup>, Seoung-Pil Jeon<sup>a</sup>, Antonio Facchetti<sup>b,c</sup>, Jaekyun Kim<sup>\*d</sup> and Sung Kyu Park<sup>\*a</sup>

<sup>a</sup>. School of Electrical and Electronic Engineering, Chung-Ang University, Seoul, 06974, Republic of Korea.

<sup>b</sup>. Department of Chemistry and the Materials Research Center and the Argonne-Northwestern Solar Energy Research Center, Northwestern University, Evanston, Illinois, 60208, United States.

<sup>c</sup>. Flexterra Inc., Skokie, Illinois 60077, United States.

<sup>d</sup>. Department of Photonics and Nanoelectronics, Hanyang university, Ansan, Gyeonggi-do, 15588, Republic of Korea.

\* Correspondence and requests for materials should be addressed to S. K. Park (e-mail: skpark@cau.ac.kr) or J. Kim (e-mail: jaekyunkim@hanyang.ac.kr)

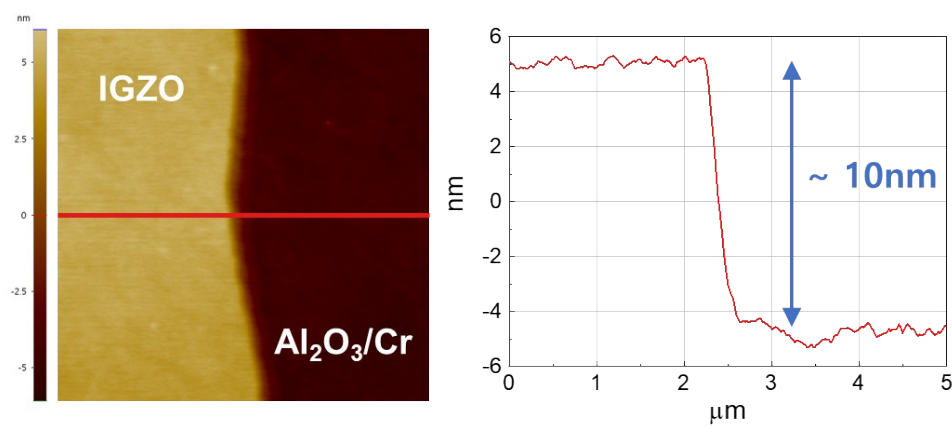

**Fig. S1** The AFM image and its line profile for the IGZO film, which demonstrate the thickness of the sensing layer is about 10 nm.

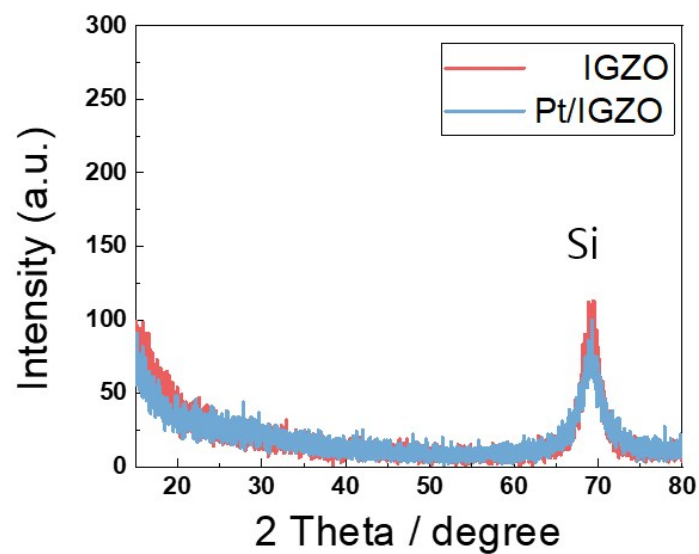

**Fig. S2** The XRD spectrum of the pristine IGZO (red solid line) and Pt decorated IGZO (blue solid line). The solution processed IGZO film shows an amorphous phase after a thermal annealing process at 350 °C for 1 hr. There are no peaks related to crystalline formation or Pt

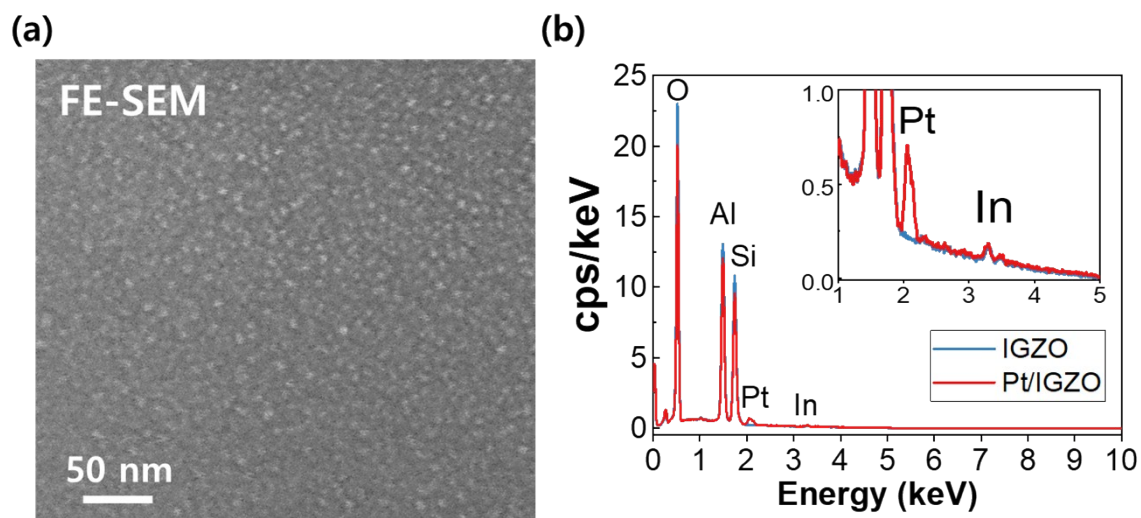

**Fig. S3** (a) FE-SEM image of the Pt/IGZO film shows Pt grains. (b) EDS spectrum of the pristine IGZO (blue solid line) and Pt/IGZO (red solid line). The presence of Pt is clearly observed in Pt/IGZO film.

| ppm | Standard Deviation | Average | RSD (%) |
|-----|--------------------|---------|---------|
| 1   | 0.20292            | 0.98667 | 20.56   |
| 3   | 0.22396            | 2.89667 | 7.73    |
| 5   | 0.25278            | 5.00167 | 5.05    |
| 7   | 0.49427            | 6.71    | 7.36    |
| 10  | 0.33043            | 9.62833 | 3.43    |

**Table S1** Summary of the standard deviation, average, and relative standard deviation (RSD). 60 points were recorded for each concentration of isobutylene from the display of the VOC monitoring system. [RSD= (standard deviation / average) ×100]
